# Supplementary material
Source: publisher site journal article supplement (https://www.spandidos-publications.com/3144/downloadSupplementary)
Supplement: Supplementary file 1 [file downloadSupplementary]

## Sheet: kegg
Table SIV. Statistically significant KEGG pathways for AKI-24 h/AKI-Pre.
Pathway Name	Pathway ID	Pvalue	Pvalue_adjusted	Genes	Count	Pop Hit	List_Total	Background Genes	URL
Lysosome	hsa04142	3.45e-08	5.25e-06	PSAP|7.656;GAA|14.4544;NAGLU|8.3946;GLB1|2.5119;GNS|3.8019;ARSA|15.8489;HEXB|2.729;ASAH1|4.9204;ACP2|2.5823;FUCA1|12.942;CD63|2.0893;GUSB|0.7311	12	123	88	6981	http://www.kegg.jp/kegg-bin/show_pathway?hsa04142/hsa:5660%09red/hsa:2548%09red/hsa:4669%09red/hsa:2720%09red/hsa:2799%09red/hsa:410%09red/hsa:3074%09red/hsa:427%09red/hsa:53%09red/hsa:2517%09red/hsa:967%09red/hsa:2990%09blue
Complement and coagulation cascades	hsa04610	1.62e-07	1.23e-05	C3|1.4997;C4A|0.673;SERPINA1|29.3765;A2M|7.5858;F2|0.1009;SERPINA5|0.2109;SERPINC1|3.4674;CD55|0.2535;FGG|3.0479	9	69	88	6981	http://www.kegg.jp/kegg-bin/show_pathway?hsa04610/hsa:718%09red/hsa:720%09blue/hsa:5265%09red/hsa:2%09red/hsa:2147%09blue/hsa:5104%09blue/hsa:462%09red/hsa:1604%09blue/hsa:2266%09red
Glycosaminoglycan degradation	hsa00531	2.87e-06	0.000134	NAGLU|8.3946;GLB1|2.5119;GNS|3.8019;HEXB|2.729;GUSB|0.7311	5	19	88	6981	http://www.kegg.jp/kegg-bin/show_pathway?hsa00531/hsa:4669%09red/hsa:2720%09red/hsa:2799%09red/hsa:3074%09red/hsa:2990%09blue
Biosynthesis of amino acids	hsa01230	3.53e-06	0.000134	ACY1|17.378;PGK1|6.0256;ENO1|7.8705;TPI1|15.2757;GAPDH|6.0256;ALDOA|1.7378;ASS1|2.4889;IDH1|2.3335	8	74	88	6981	http://www.kegg.jp/kegg-bin/show_pathway?hsa01230/hsa:95%09red/hsa:5230%09red/hsa:2023%09red/hsa:7167%09red/hsa:2597%09red/hsa:226%09red/hsa:445%09red/hsa:3417%09red
Glutathione metabolism	hsa00480	4.32e-05	0.00131	ANPEP|12.0226;GGT1|5.2;IDH1|2.3335;GSTA2|18.5353;GPX3|15.1356;GSTP1|11.8032	6	52	88	6981	http://www.kegg.jp/kegg-bin/show_pathway?hsa00480/hsa:290%09red/hsa:2678%09red/hsa:3417%09red/hsa:2939%09red/hsa:2878%09red/hsa:2950%09red
Renin-angiotensin system	hsa04614	0.000174	0.00395	ANPEP|12.0226;ENPEP|21.0863;MME|5.2481;ACE|2.2909	4	23	88	6981	http://www.kegg.jp/kegg-bin/show_pathway?hsa04614/hsa:290%09red/hsa:2028%09red/hsa:4311%09red/hsa:1636%09red
Glycolysis / Gluconeogenesis	hsa00010	0.000182	0.00395	PGK1|6.0256;ENO1|7.8705;TPI1|15.2757;GAPDH|6.0256;LDHB|8.9536;ALDOA|1.7378	6	67	88	6981	http://www.kegg.jp/kegg-bin/show_pathway?hsa00010/hsa:5230%09red/hsa:2023%09red/hsa:7167%09red/hsa:2597%09red/hsa:3945%09red/hsa:226%09red
Carbon metabolism	hsa01200	0.000521	0.0099	PGK1|6.0256;ENO1|7.8705;TPI1|15.2757;GAPDH|6.0256;CAT|15.417;ALDOA|1.7378;IDH1|2.3335	7	113	88	6981	http://www.kegg.jp/kegg-bin/show_pathway?hsa01200/hsa:5230%09red/hsa:2023%09red/hsa:7167%09red/hsa:2597%09red/hsa:847%09red/hsa:226%09red/hsa:3417%09red
Metabolic pathways	hsa01100	0.000846	0.0143	ANPEP|12.0226;MGAM|7.379;GAA|14.4544;GGT1|5.2;ACY1|17.378;NAGLU|8.3946;PGK1|6.0256;ENO1|7.8705;GLB1|2.5119;TPI1|15.2757;GAPDH|6.0256;GNS|3.8019;HEXB|2.729;ASAH1|4.9204;LDHB|8.9536;BHMT|13.5519;ALDOA|1.7378;ASS1|2.4889;IDH1|2.3335;PRDX6|6.9183;CNDP2|17.0608;SORD|1.7219;AHCY|2.6546;PNP|7.7983;CKB|3.0761;FAH|5.445;GUSB|0.7311;BPNT1|12.2462	28	1233	88	6981	http://www.kegg.jp/kegg-bin/show_pathway?hsa01100/hsa:290%09red/hsa:8972%09red/hsa:2548%09red/hsa:2678%09red/hsa:95%09red/hsa:4669%09red/hsa:5230%09red/hsa:2023%09red/hsa:2720%09red/hsa:7167%09red/hsa:2597%09red/hsa:2799%09red/hsa:3074%09red/hsa:427%09red/hsa:3945%09red/hsa:635%09red/hsa:226%09red/hsa:445%09red/hsa:3417%09red/hsa:9588%09red/hsa:55748%09red/hsa:6652%09red/hsa:191%09red/hsa:4860%09…
Other glycan degradation	hsa00511	0.00138	0.0209	GLB1|2.5119;HEXB|2.729;FUCA1|12.942	3	18	88	6981	http://www.kegg.jp/kegg-bin/show_pathway?hsa00511/hsa:2720%09red/hsa:3074%09red/hsa:2517%09red
Galactose metabolism	hsa00052	0.00615	0.0849	MGAM|7.379;GAA|14.4544;GLB1|2.5119	3	30	88	6981	http://www.kegg.jp/kegg-bin/show_pathway?hsa00052/hsa:8972%09red/hsa:2548%09red/hsa:2720%09red
Fructose and mannose metabolism	hsa00051	0.00737	0.0934	TPI1|15.2757;ALDOA|1.7378;SORD|1.7219	3	32	88	6981	http://www.kegg.jp/kegg-bin/show_pathway?hsa00051/hsa:7167%09red/hsa:226%09red/hsa:6652%09red
HIF-1 signaling pathway	hsa04066	0.00945	0.103	TF|1.2823;PGK1|6.0256;ENO1|7.8705;GAPDH|6.0256;ALDOA|1.7378	5	103	88	6981	http://www.kegg.jp/kegg-bin/show_pathway?hsa04066/hsa:7018%09red/hsa:5230%09red/hsa:2023%09red/hsa:2597%09red/hsa:226%09red
African trypanosomiasis	hsa05143	0.00947	0.103	APOA1|18.8799;HBB|1.6904;HBA1|1.6144	3	35	88	6981	http://www.kegg.jp/kegg-bin/show_pathway?hsa05143/hsa:335%09red/hsa:3043%09red/hsa:3039%09red
Adherens junction	hsa04520	0.0133	0.134	CDH1|0.7311;PVRL2|0.0887;ACTN4|10.8643;CDC42|99.0832	4	73	88	6981	http://www.kegg.jp/kegg-bin/show_pathway?hsa04520/hsa:999%09blue/hsa:5819%09blue/hsa:81%09red/hsa:998%09red
Glycosphingolipid biosynthesis - ganglio series	hsa00604	0.0148	0.141	GLB1|2.5119;HEXB|2.729	2	15	88	6981	http://www.kegg.jp/kegg-bin/show_pathway?hsa00604/hsa:2720%09red/hsa:3074%09red
Cysteine and methionine metabolism	hsa00270	0.0177	0.158	LDHB|8.9536;BHMT|13.5519;AHCY|2.6546	3	44	88	6981	http://www.kegg.jp/kegg-bin/show_pathway?hsa00270/hsa:3945%09red/hsa:635%09red/hsa:191%09red
2-Oxocarboxylic acid metabolism	hsa01210	0.0189	0.16	ACY1|17.378;IDH1|2.3335	2	17	88	6981	http://www.kegg.jp/kegg-bin/show_pathway?hsa01210/hsa:95%09red/hsa:3417%09red
Peroxisome	hsa04146	0.0204	0.16	CAT|15.417;SOD1|16.1436;PRDX1|3.1623;IDH1|2.3335	4	83	88	6981	http://www.kegg.jp/kegg-bin/show_pathway?hsa04146/hsa:847%09red/hsa:6647%09red/hsa:5052%09red/hsa:3417%09red
Sphingolipid metabolism	hsa00600	0.0211	0.16	GLB1|2.5119;ARSA|15.8489;ASAH1|4.9204	3	47	88	6981	http://www.kegg.jp/kegg-bin/show_pathway?hsa00600/hsa:2720%09red/hsa:410%09red/hsa:427%09red
Arginine biosynthesis	hsa00220	0.0258	0.186	ACY1|17.378;ASS1|2.4889	2	20	88	6981	http://www.kegg.jp/kegg-bin/show_pathway?hsa00220/hsa:95%09red/hsa:445%09red
Staphylococcus aureus infection	hsa05150	0.0332	0.22	C3|1.4997;C4A|0.673;FGG|3.0479	3	56	88	6981	http://www.kegg.jp/kegg-bin/show_pathway?hsa05150/hsa:718%09red/hsa:720%09blue/hsa:2266%09red
Starch and sucrose metabolism	hsa00500	0.0332	0.22	MGAM|7.379;GAA|14.4544;GUSB|0.7311	3	56	88	6981	http://www.kegg.jp/kegg-bin/show_pathway?hsa00500/hsa:8972%09red/hsa:2548%09red/hsa:2990%09blue
Vitamin digestion and absorption	hsa04977	0.0362	0.229	CUBN|0.3597;APOA1|18.8799	2	24	88	6981	http://www.kegg.jp/kegg-bin/show_pathway?hsa04977/hsa:8029%09blue/hsa:335%09red
Metabolism of xenobiotics by cytochrome P450	hsa00980	0.0684	0.416	GSTA2|18.5353;GSTP1|11.8032;AKR7A3|4.3251	3	75	88	6981	http://www.kegg.jp/kegg-bin/show_pathway?hsa00980/hsa:2939%09red/hsa:2950%09red/hsa:22977%09red
Pentose and glucuronate interconversions	hsa00040	0.0751	0.439	SORD|1.7219;GUSB|0.7311	2	36	88	6981	http://www.kegg.jp/kegg-bin/show_pathway?hsa00040/hsa:6652%09red/hsa:2990%09blue
Cyanoamino acid metabolism	hsa00460	0.085	0.473	GGT1|5.2	1	7	88	6981	http://www.kegg.jp/kegg-bin/show_pathway?hsa00460/hsa:2678%09red
Pyruvate metabolism	hsa00620	0.0901	0.473	LDHB|8.9536;GLO1|3.1333	2	40	88	6981	http://www.kegg.jp/kegg-bin/show_pathway?hsa00620/hsa:3945%09red/hsa:2739%09red
Systemic lupus erythematosus	hsa05322	0.0903	0.473	C3|1.4997;C4A|0.673;ACTN4|10.8643;ELANE|0.4246	4	135	88	6981	http://www.kegg.jp/kegg-bin/show_pathway?hsa05322/hsa:718%09red/hsa:720%09blue/hsa:81%09red/hsa:1991%09blue
Fat digestion and absorption	hsa04975	0.0939	0.476	APOA1|18.8799;FABP1|14.3219	2	41	88	6981	http://www.kegg.jp/kegg-bin/show_pathway?hsa04975/hsa:335%09red/hsa:2168%09red
Hematopoietic cell lineage	hsa04640	0.0991	0.48	ANPEP|12.0226;MME|5.2481;CD55|0.2535	3	88	88	6981	http://www.kegg.jp/kegg-bin/show_pathway?hsa04640/hsa:290%09red/hsa:4311%09red/hsa:1604%09blue
Prostate cancer	hsa05215	0.102	0.48	KLK3|4.4875;GSTP1|11.8032;HSP90AA1|11.5878	3	89	88	6981	http://www.kegg.jp/kegg-bin/show_pathway?hsa05215/hsa:354%09red/hsa:2950%09red/hsa:3320%09red
Protein digestion and absorption	hsa04974	0.104	0.48	DPP4|4.7424;MME|5.2481;PGA3|0.1138	3	90	88	6981	http://www.kegg.jp/kegg-bin/show_pathway?hsa04974/hsa:1803%09red/hsa:4311%09red/hsa:101929842%09blue
Focal adhesion	hsa04510	0.111	0.496	SPP1|0.1406;ACTN4|10.8643;MYLK|0.6427;FLNC|0.6855;CDC42|99.0832	5	202	88	6981	http://www.kegg.jp/kegg-bin/show_pathway?hsa04510/hsa:6696%09blue/hsa:81%09red/hsa:4638%09blue/hsa:2318%09blue/hsa:998%09red
Sulfur metabolism	hsa00920	0.119	0.5	BPNT1|12.2462	1	10	88	6981	http://www.kegg.jp/kegg-bin/show_pathway?hsa00920/hsa:10380%09red
Intestinal immune network for IgA production	hsa04672	0.122	0.5	PIGR|0.7586;MADCAM1|0.7178	2	48	88	6981	http://www.kegg.jp/kegg-bin/show_pathway?hsa04672/hsa:5284%09blue/hsa:8174%09blue
Malaria	hsa05144	0.126	0.5	HBB|1.6904;HBA1|1.6144	2	49	88	6981	http://www.kegg.jp/kegg-bin/show_pathway?hsa05144/hsa:3043%09red/hsa:3039%09red
Taurine and hypotaurine metabolism	hsa00430	0.13	0.5	GGT1|5.2	1	11	88	6981	http://www.kegg.jp/kegg-bin/show_pathway?hsa00430/hsa:2678%09red
Arginine and proline metabolism	hsa00330	0.131	0.5	CNDP2|17.0608;CKB|3.0761	2	50	88	6981	http://www.kegg.jp/kegg-bin/show_pathway?hsa00330/hsa:55748%09red/hsa:1152%09red
Regulation of actin cytoskeleton	hsa04810	0.132	0.5	F2|0.1009;ACTN4|10.8643;MYLK|0.6427;FGFR4|6.9823;CDC42|99.0832	5	214	88	6981	http://www.kegg.jp/kegg-bin/show_pathway?hsa04810/hsa:2147%09blue/hsa:81%09red/hsa:4638%09blue/hsa:2264%09red/hsa:998%09red
Amyotrophic lateral sclerosis (ALS)	hsa05014	0.135	0.5	CAT|15.417;SOD1|16.1436	2	51	88	6981	http://www.kegg.jp/kegg-bin/show_pathway?hsa05014/hsa:847%09red/hsa:6647%09red
Legionellosis	hsa05134	0.152	0.539	C3|1.4997;HSPA8|4.3251	2	55	88	6981	http://www.kegg.jp/kegg-bin/show_pathway?hsa05134/hsa:718%09red/hsa:3312%09red
Pathogenic Escherichia coli infection	hsa05130	0.152	0.539	CDH1|0.7311;CDC42|99.0832	2	55	88	6981	http://www.kegg.jp/kegg-bin/show_pathway?hsa05130/hsa:999%09blue/hsa:998%09red
Glycosphingolipid biosynthesis - globo series	hsa00603	0.163	0.563	HEXB|2.729	1	14	88	6981	http://www.kegg.jp/kegg-bin/show_pathway?hsa00603/hsa:3074%09red
Viral myocarditis	hsa05416	0.17	0.575	CD55|0.2535;DAG1|3.02	2	59	88	6981	http://www.kegg.jp/kegg-bin/show_pathway?hsa05416/hsa:1604%09blue/hsa:1605%09red
Arachidonic acid metabolism	hsa00590	0.184	0.607	GGT1|5.2;GPX3|15.1356	2	62	88	6981	http://www.kegg.jp/kegg-bin/show_pathway?hsa00590/hsa:2678%09red/hsa:2878%09red
Nitrogen metabolism	hsa00910	0.194	0.628	CA1|26.3027	1	17	88	6981	http://www.kegg.jp/kegg-bin/show_pathway?hsa00910/hsa:759%09red
Drug metabolism - cytochrome P450	hsa00982	0.216	0.67	GSTA2|18.5353;GSTP1|11.8032	2	69	88	6981	http://www.kegg.jp/kegg-bin/show_pathway?hsa00982/hsa:2939%09red/hsa:2950%09red
PPAR signaling pathway	hsa03320	0.216	0.67	APOA1|18.8799;FABP1|14.3219	2	69	88	6981	http://www.kegg.jp/kegg-bin/show_pathway?hsa03320/hsa:335%09red/hsa:2168%09red
Thyroid hormone synthesis	hsa04918	0.225	0.685	LRP2|0.4365;GPX3|15.1356	2	71	88	6981	http://www.kegg.jp/kegg-bin/show_pathway?hsa04918/hsa:4036%09blue/hsa:2878%09red
Arrhythmogenic right ventricular cardiomyopathy (ARVC)	hsa05412	0.239	0.713	ACTN4|10.8643;DAG1|3.02	2	74	88	6981	http://www.kegg.jp/kegg-bin/show_pathway?hsa05412/hsa:81%09red/hsa:1605%09red
Pertussis	hsa05133	0.244	0.713	C3|1.4997;C4A|0.673	2	75	88	6981	http://www.kegg.jp/kegg-bin/show_pathway?hsa05133/hsa:718%09red/hsa:720%09blue
Antigen processing and presentation	hsa04612	0.253	0.713	HSPA8|4.3251;HSP90AA1|11.5878	2	77	88	6981	http://www.kegg.jp/kegg-bin/show_pathway?hsa04612/hsa:3312%09red/hsa:3320%09red
Histidine metabolism	hsa00340	0.253	0.713	CNDP2|17.0608	1	23	88	6981	http://www.kegg.jp/kegg-bin/show_pathway?hsa00340/hsa:55748%09red
Bacterial invasion of epithelial cells	hsa05100	0.258	0.713	CDH1|0.7311;CDC42|99.0832	2	78	88	6981	http://www.kegg.jp/kegg-bin/show_pathway?hsa05100/hsa:999%09blue/hsa:998%09red
Cell adhesion molecules (CAMs)	hsa04514	0.266	0.721	CDH1|0.7311;PVRL2|0.0887;MADCAM1|0.7178	3	142	88	6981	http://www.kegg.jp/kegg-bin/show_pathway?hsa04514/hsa:999%09blue/hsa:5819%09blue/hsa:8174%09blue
ECM-receptor interaction	hsa04512	0.277	0.725	SPP1|0.1406;DAG1|3.02	2	82	88	6981	http://www.kegg.jp/kegg-bin/show_pathway?hsa04512/hsa:6696%09blue/hsa:1605%09red
Chemical carcinogenesis	hsa05204	0.277	0.725	GSTA2|18.5353;GSTP1|11.8032	2	82	88	6981	http://www.kegg.jp/kegg-bin/show_pathway?hsa05204/hsa:2939%09red/hsa:2950%09red
Hypertrophic cardiomyopathy (HCM)	hsa05410	0.281	0.725	DAG1|3.02;ACE|2.2909	2	83	88	6981	http://www.kegg.jp/kegg-bin/show_pathway?hsa05410/hsa:1605%09red/hsa:1636%09red
Salmonella infection	hsa05132	0.295	0.732	FLNC|0.6855;CDC42|99.0832	2	86	88	6981	http://www.kegg.jp/kegg-bin/show_pathway?hsa05132/hsa:2318%09blue/hsa:998%09red
Glyoxylate and dicarboxylate metabolism	hsa00630	0.299	0.732	CAT|15.417	1	28	88	6981	http://www.kegg.jp/kegg-bin/show_pathway?hsa00630/hsa:847%09red
Pentose phosphate pathway	hsa00030	0.308	0.732	ALDOA|1.7378	1	29	88	6981	http://www.kegg.jp/kegg-bin/show_pathway?hsa00030/hsa:226%09red
Thyroid cancer	hsa05216	0.308	0.732	CDH1|0.7311	1	29	88	6981	http://www.kegg.jp/kegg-bin/show_pathway?hsa05216/hsa:999%09blue
Nicotinate and nicotinamide metabolism	hsa00760	0.308	0.732	PNP|7.7983	1	29	88	6981	http://www.kegg.jp/kegg-bin/show_pathway?hsa00760/hsa:4860%09red
Citrate cycle (TCA cycle)	hsa00020	0.317	0.741	IDH1|2.3335	1	30	88	6981	http://www.kegg.jp/kegg-bin/show_pathway?hsa00020/hsa:3417%09red
beta-Alanine metabolism	hsa00410	0.326	0.75	CNDP2|17.0608	1	31	88	6981	http://www.kegg.jp/kegg-bin/show_pathway?hsa00410/hsa:55748%09red
Propanoate metabolism	hsa00640	0.334	0.758	LDHB|8.9536	1	32	88	6981	http://www.kegg.jp/kegg-bin/show_pathway?hsa00640/hsa:3945%09red
Estrogen signaling pathway	hsa04915	0.356	0.769	HSPA8|4.3251;HSP90AA1|11.5878	2	99	88	6981	http://www.kegg.jp/kegg-bin/show_pathway?hsa04915/hsa:3312%09red/hsa:3320%09red
Alanine, aspartate and glutamate metabolism	hsa00250	0.359	0.769	ASS1|2.4889	1	35	88	6981	http://www.kegg.jp/kegg-bin/show_pathway?hsa00250/hsa:445%09red
Prion diseases	hsa05020	0.359	0.769	SOD1|16.1436	1	35	88	6981	http://www.kegg.jp/kegg-bin/show_pathway?hsa05020/hsa:6647%09red
Tyrosine metabolism	hsa00350	0.359	0.769	FAH|5.445	1	35	88	6981	http://www.kegg.jp/kegg-bin/show_pathway?hsa00350/hsa:2184%09red
Chagas disease (American trypanosomiasis)	hsa05142	0.379	0.799	C3|1.4997;ACE|2.2909	2	104	88	6981	http://www.kegg.jp/kegg-bin/show_pathway?hsa05142/hsa:718%09red/hsa:1636%09red
Glycine, serine and threonine metabolism	hsa00260	0.399	0.809	BHMT|13.5519	1	40	88	6981	http://www.kegg.jp/kegg-bin/show_pathway?hsa00260/hsa:635%09red
Tryptophan metabolism	hsa00380	0.399	0.809	CAT|15.417	1	40	88	6981	http://www.kegg.jp/kegg-bin/show_pathway?hsa00380/hsa:847%09red
MAPK signaling pathway	hsa04010	0.402	0.809	HSPA8|4.3251;FLNC|0.6855;FGFR4|6.9823;CDC42|99.0832	4	255	88	6981	http://www.kegg.jp/kegg-bin/show_pathway?hsa04010/hsa:3312%09red/hsa:2318%09blue/hsa:2264%09red/hsa:998%09red
Bladder cancer	hsa05219	0.406	0.809	CDH1|0.7311	1	41	88	6981	http://www.kegg.jp/kegg-bin/show_pathway?hsa05219/hsa:999%09blue
Porphyrin and chlorophyll metabolism	hsa00860	0.414	0.809	GUSB|0.7311	1	42	88	6981	http://www.kegg.jp/kegg-bin/show_pathway?hsa00860/hsa:2990%09blue
Type I diabetes mellitus	hsa04940	0.421	0.809	CPE|4.4055	1	43	88	6981	http://www.kegg.jp/kegg-bin/show_pathway?hsa04940/hsa:1363%09red
Vasopressin-regulated water reabsorption	hsa04962	0.429	0.809	ARHGDIA|31.3329	1	44	88	6981	http://www.kegg.jp/kegg-bin/show_pathway?hsa04962/hsa:396%09red
Carbohydrate digestion and absorption	hsa04973	0.436	0.809	MGAM|7.379	1	45	88	6981	http://www.kegg.jp/kegg-bin/show_pathway?hsa04973/hsa:8972%09red
Leukocyte transendothelial migration	hsa04670	0.44	0.809	ACTN4|10.8643;CDC42|99.0832	2	118	88	6981	http://www.kegg.jp/kegg-bin/show_pathway?hsa04670/hsa:81%09red/hsa:998%09red
Drug metabolism - other enzymes	hsa00983	0.443	0.809	GUSB|0.7311	1	46	88	6981	http://www.kegg.jp/kegg-bin/show_pathway?hsa00983/hsa:2990%09blue
Neurotrophin signaling pathway	hsa04722	0.449	0.809	ARHGDIA|31.3329;CDC42|99.0832	2	120	88	6981	http://www.kegg.jp/kegg-bin/show_pathway?hsa04722/hsa:396%09red/hsa:998%09red
Amino sugar and nucleotide sugar metabolism	hsa00520	0.457	0.809	HEXB|2.729	1	48	88	6981	http://www.kegg.jp/kegg-bin/show_pathway?hsa00520/hsa:3074%09red
Platelet activation	hsa04611	0.457	0.809	FGG|3.0479;MYLK|0.6427	2	122	88	6981	http://www.kegg.jp/kegg-bin/show_pathway?hsa04611/hsa:2266%09red/hsa:4638%09blue
Proteoglycans in cancer	hsa05205	0.474	0.809	CD63|2.0893;FLNC|0.6855;CDC42|99.0832	3	203	88	6981	http://www.kegg.jp/kegg-bin/show_pathway?hsa05205/hsa:967%09red/hsa:2318%09blue/hsa:998%09red
Hedgehog signaling pathway	hsa04340	0.478	0.809	LRP2|0.4365	1	51	88	6981	http://www.kegg.jp/kegg-bin/show_pathway?hsa04340/hsa:4036%09blue
Mineral absorption	hsa04978	0.478	0.809	TF|1.2823	1	51	88	6981	http://www.kegg.jp/kegg-bin/show_pathway?hsa04978/hsa:7018%09red
Axon guidance	hsa04360	0.478	0.809	EPHB4|0.6081;CDC42|99.0832	2	127	88	6981	http://www.kegg.jp/kegg-bin/show_pathway?hsa04360/hsa:2050%09blue/hsa:998%09red
Viral carcinogenesis	hsa05203	0.481	0.809	C3|1.4997;ACTN4|10.8643;CDC42|99.0832	3	205	88	6981	http://www.kegg.jp/kegg-bin/show_pathway?hsa05203/hsa:718%09red/hsa:81%09red/hsa:998%09red
Endometrial cancer	hsa05213	0.484	0.809	CDH1|0.7311	1	52	88	6981	http://www.kegg.jp/kegg-bin/show_pathway?hsa05213/hsa:999%09blue
Rap1 signaling pathway	hsa04015	0.5	0.826	CDH1|0.7311;FGFR4|6.9823;CDC42|99.0832	3	211	88	6981	http://www.kegg.jp/kegg-bin/show_pathway?hsa04015/hsa:999%09blue/hsa:2264%09red/hsa:998%09red
NOD-like receptor signaling pathway	hsa04621	0.516	0.838	HSP90AA1|11.5878	1	57	88	6981	http://www.kegg.jp/kegg-bin/show_pathway?hsa04621/hsa:3320%09red
Tight junction	hsa04530	0.523	0.838	ACTN4|10.8643;CDC42|99.0832	2	138	88	6981	http://www.kegg.jp/kegg-bin/show_pathway?hsa04530/hsa:81%09red/hsa:998%09red
Wnt signaling pathway	hsa04310	0.534	0.838	SERPINF1|3.2509;MMP7|0.0619	2	141	88	6981	http://www.kegg.jp/kegg-bin/show_pathway?hsa04310/hsa:5176%09red/hsa:4316%09blue
Parkinson's disease	hsa05012	0.538	0.838	PARK7|5.445;UBA1|0.2128	2	142	88	6981	http://www.kegg.jp/kegg-bin/show_pathway?hsa05012/hsa:11315%09red/hsa:7317%09blue
Signaling pathways regulating pluripotency of stem cells	hsa04550	0.538	0.838	ACVR1B|0.1294;FGFR4|6.9823	2	142	88	6981	http://www.kegg.jp/kegg-bin/show_pathway?hsa04550/hsa:91%09blue/hsa:2264%09red
VEGF signaling pathway	hsa04370	0.54	0.838	CDC42|99.0832	1	61	88	6981	http://www.kegg.jp/kegg-bin/show_pathway?hsa04370/hsa:998%09red
Renin secretion	hsa04924	0.558	0.838	ACE|2.2909	1	64	88	6981	http://www.kegg.jp/kegg-bin/show_pathway?hsa04924/hsa:1636%09red
Shigellosis	hsa05131	0.563	0.838	CDC42|99.0832	1	65	88	6981	http://www.kegg.jp/kegg-bin/show_pathway?hsa05131/hsa:998%09red
Pathways in cancer	hsa05200	0.567	0.838	CDH1|0.7311;KLK3|4.4875;GSTP1|11.8032;HSP90AA1|11.5878;CDC42|99.0832	5	397	88	6981	http://www.kegg.jp/kegg-bin/show_pathway?hsa05200/hsa:999%09blue/hsa:354%09red/hsa:2950%09red/hsa:3320%09red/hsa:998%09red
Renal cell carcinoma	hsa05211	0.569	0.838	CDC42|99.0832	1	66	88	6981	http://www.kegg.jp/kegg-bin/show_pathway?hsa05211/hsa:998%09red
Pancreatic cancer	hsa05212	0.569	0.838	CDC42|99.0832	1	66	88	6981	http://www.kegg.jp/kegg-bin/show_pathway?hsa05212/hsa:998%09red
Central carbon metabolism in cancer	hsa05230	0.574	0.838	IDH1|2.3335	1	67	88	6981	http://www.kegg.jp/kegg-bin/show_pathway?hsa05230/hsa:3417%09red
Epithelial cell signaling in Helicobacter pylori infection	hsa05120	0.58	0.838	CDC42|99.0832	1	68	88	6981	http://www.kegg.jp/kegg-bin/show_pathway?hsa05120/hsa:998%09red
p53 signaling pathway	hsa04115	0.585	0.838	SHISA5|0.2965	1	69	88	6981	http://www.kegg.jp/kegg-bin/show_pathway?hsa04115/hsa:51246%09blue
Melanoma	hsa05218	0.596	0.838	CDH1|0.7311	1	71	88	6981	http://www.kegg.jp/kegg-bin/show_pathway?hsa05218/hsa:999%09blue
Inositol phosphate metabolism	hsa00562	0.596	0.838	TPI1|15.2757	1	71	88	6981	http://www.kegg.jp/kegg-bin/show_pathway?hsa00562/hsa:7167%09red
Leishmaniasis	hsa05140	0.606	0.844	C3|1.4997	1	73	88	6981	http://www.kegg.jp/kegg-bin/show_pathway?hsa05140/hsa:718%09red
Gastric acid secretion	hsa04971	0.611	0.844	MYLK|0.6427	1	74	88	6981	http://www.kegg.jp/kegg-bin/show_pathway?hsa04971/hsa:4638%09blue
RNA degradation	hsa03018	0.626	0.85	ENO1|7.8705	1	77	88	6981	http://www.kegg.jp/kegg-bin/show_pathway?hsa03018/hsa:2023%09red
Alzheimer's disease	hsa05010	0.63	0.85	MME|5.2481;GAPDH|6.0256	2	168	88	6981	http://www.kegg.jp/kegg-bin/show_pathway?hsa05010/hsa:4311%09red/hsa:2597%09red
Protein processing in endoplasmic reticulum	hsa04141	0.633	0.85	HSPA8|4.3251;HSP90AA1|11.5878	2	169	88	6981	http://www.kegg.jp/kegg-bin/show_pathway?hsa04141/hsa:3312%09red/hsa:3320%09red
Endocytosis	hsa04144	0.637	0.85	HSPA8|4.3251;FGFR4|6.9823;CDC42|99.0832	3	258	88	6981	http://www.kegg.jp/kegg-bin/show_pathway?hsa04144/hsa:3312%09red/hsa:2264%09red/hsa:998%09red
TGF-beta signaling pathway	hsa04350	0.658	0.869	ACVR1B|0.1294	1	84	88	6981	http://www.kegg.jp/kegg-bin/show_pathway?hsa04350/hsa:91%09blue
Progesterone-mediated oocyte maturation	hsa04914	0.671	0.87	HSP90AA1|11.5878	1	87	88	6981	http://www.kegg.jp/kegg-bin/show_pathway?hsa04914/hsa:3320%09red
Salivary secretion	hsa04970	0.679	0.87	LYZ|0.5445	1	89	88	6981	http://www.kegg.jp/kegg-bin/show_pathway?hsa04970/hsa:4069%09blue
Herpes simplex infection	hsa05168	0.68	0.87	C3|1.4997;PVRL2|0.0887	2	184	88	6981	http://www.kegg.jp/kegg-bin/show_pathway?hsa05168/hsa:718%09red/hsa:5819%09blue
Dilated cardiomyopathy	hsa05414	0.683	0.87	DAG1|3.02	1	90	88	6981	http://www.kegg.jp/kegg-bin/show_pathway?hsa05414/hsa:1605%09red
GnRH signaling pathway	hsa04912	0.687	0.87	CDC42|99.0832	1	91	88	6981	http://www.kegg.jp/kegg-bin/show_pathway?hsa04912/hsa:998%09red
Fc gamma R-mediated phagocytosis	hsa04666	0.695	0.873	CDC42|99.0832	1	93	88	6981	http://www.kegg.jp/kegg-bin/show_pathway?hsa04666/hsa:998%09red
Glucagon signaling pathway	hsa04922	0.725	0.895	LDHB|8.9536	1	101	88	6981	http://www.kegg.jp/kegg-bin/show_pathway?hsa04922/hsa:3945%09red
Amoebiasis	hsa05146	0.725	0.895	ACTN4|10.8643	1	101	88	6981	http://www.kegg.jp/kegg-bin/show_pathway?hsa05146/hsa:81%09red
T cell receptor signaling pathway	hsa04660	0.735	0.895	CDC42|99.0832	1	104	88	6981	http://www.kegg.jp/kegg-bin/show_pathway?hsa04660/hsa:998%09red
Pyrimidine metabolism	hsa00240	0.739	0.895	PNP|7.7983	1	105	88	6981	http://www.kegg.jp/kegg-bin/show_pathway?hsa00240/hsa:4860%09red
Toll-like receptor signaling pathway	hsa04620	0.742	0.895	SPP1|0.1406	1	106	88	6981	http://www.kegg.jp/kegg-bin/show_pathway?hsa04620/hsa:6696%09blue
Toxoplasmosis	hsa05145	0.779	0.919	HSPA8|4.3251	1	118	88	6981	http://www.kegg.jp/kegg-bin/show_pathway?hsa05145/hsa:3312%09red
Vascular smooth muscle contraction	hsa04270	0.785	0.919	MYLK|0.6427	1	120	88	6981	http://www.kegg.jp/kegg-bin/show_pathway?hsa04270/hsa:4638%09blue
Sphingolipid signaling pathway	hsa04071	0.785	0.919	ASAH1|4.9204	1	120	88	6981	http://www.kegg.jp/kegg-bin/show_pathway?hsa04071/hsa:427%09red
Ras signaling pathway	hsa04014	0.786	0.919	FGFR4|6.9823;CDC42|99.0832	2	227	88	6981	http://www.kegg.jp/kegg-bin/show_pathway?hsa04014/hsa:2264%09red/hsa:998%09red
PI3K-Akt signaling pathway	hsa04151	0.811	0.931	SPP1|0.1406;HSP90AA1|11.5878;FGFR4|6.9823	3	341	88	6981	http://www.kegg.jp/kegg-bin/show_pathway?hsa04151/hsa:6696%09blue/hsa:3320%09red/hsa:2264%09red
Spliceosome	hsa03040	0.82	0.931	HSPA8|4.3251	1	134	88	6981	http://www.kegg.jp/kegg-bin/show_pathway?hsa03040/hsa:3312%09red
FoxO signaling pathway	hsa04068	0.82	0.931	CAT|15.417	1	134	88	6981	http://www.kegg.jp/kegg-bin/show_pathway?hsa04068/hsa:847%09red
Measles	hsa05162	0.823	0.931	HSPA8|4.3251	1	135	88	6981	http://www.kegg.jp/kegg-bin/show_pathway?hsa05162/hsa:3312%09red
Ubiquitin mediated proteolysis	hsa04120	0.827	0.931	UBA1|0.2128	1	137	88	6981	http://www.kegg.jp/kegg-bin/show_pathway?hsa04120/hsa:7317%09blue
Non-alcoholic fatty liver disease (NAFLD)	hsa04932	0.856	0.945	CDC42|99.0832	1	151	88	6981	http://www.kegg.jp/kegg-bin/show_pathway?hsa04932/hsa:998%09red
Hippo signaling pathway	hsa04390	0.861	0.945	CDH1|0.7311	1	154	88	6981	http://www.kegg.jp/kegg-bin/show_pathway?hsa04390/hsa:999%09blue
Phagosome	hsa04145	0.861	0.945	C3|1.4997	1	154	88	6981	http://www.kegg.jp/kegg-bin/show_pathway?hsa04145/hsa:718%09red
Oxytocin signaling pathway	hsa04921	0.868	0.945	MYLK|0.6427	1	158	88	6981	http://www.kegg.jp/kegg-bin/show_pathway?hsa04921/hsa:4638%09blue
cGMP-PKG signaling pathway	hsa04022	0.883	0.945	MYLK|0.6427	1	167	88	6981	http://www.kegg.jp/kegg-bin/show_pathway?hsa04022/hsa:4638%09blue
Influenza A	hsa05164	0.894	0.945	HSPA8|4.3251	1	175	88	6981	http://www.kegg.jp/kegg-bin/show_pathway?hsa05164/hsa:3312%09red
Purine metabolism	hsa00230	0.896	0.945	PNP|7.7983	1	176	88	6981	http://www.kegg.jp/kegg-bin/show_pathway?hsa00230/hsa:4860%09red
Tuberculosis	hsa05152	0.898	0.945	C3|1.4997	1	178	88	6981	http://www.kegg.jp/kegg-bin/show_pathway?hsa05152/hsa:718%09red
Transcriptional misregulation in cancer	hsa05202	0.901	0.945	ELANE|0.4246	1	180	88	6981	http://www.kegg.jp/kegg-bin/show_pathway?hsa05202/hsa:1991%09blue
Calcium signaling pathway	hsa04020	0.901	0.945	MYLK|0.6427	1	180	88	6981	http://www.kegg.jp/kegg-bin/show_pathway?hsa04020/hsa:4638%09blue
Chemokine signaling pathway	hsa04062	0.91	0.947	CDC42|99.0832	1	187	88	6981	http://www.kegg.jp/kegg-bin/show_pathway?hsa04062/hsa:998%09red
Huntington's disease	hsa05016	0.916	0.948	SOD1|16.1436	1	193	88	6981	http://www.kegg.jp/kegg-bin/show_pathway?hsa05016/hsa:6647%09red
Epstein-Barr virus infection	hsa05169	0.925	0.95	HSPA8|4.3251	1	201	88	6981	http://www.kegg.jp/kegg-bin/show_pathway?hsa05169/hsa:3312%09red
Cytokine-cytokine receptor interaction	hsa04060	0.968	0.985	ACVR1B|0.1294	1	265	88	6981	http://www.kegg.jp/kegg-bin/show_pathway?hsa04060/hsa:91%09blue
Neuroactive ligand-receptor interaction	hsa04080	0.972	0.985	F2|0.1009	1	277	88	6981	http://www.kegg.jp/kegg-bin/show_pathway?hsa04080/hsa:2147%09blue
unkown	hsa04933	1	1	CDC42|99.0832	1	0	88	6981	http://www.kegg.jp/kegg-bin/show_pathway?hsa04933/hsa:998%09red
unkown	hsa04211	1	1	CAT|15.417	1	0	88	6981	http://www.kegg.jp/kegg-bin/show_pathway?hsa04211/hsa:847%09red
